# Supplementary material for: Dissociation channels, collisional energy transfer, and multichannel coupling effects in the thermal decomposition of CH3F
Source: Royal Society of Chemistry journal article supplement (doi:10.1039/c8cp02126k), 2018-01-01
Supplement: c8cp02126k1.pdf [file c8cp02126k1.pdf]

Electronic supplementary information for:

## Dissociation channels, collisional energy transfer, and multichannel coupling effects in the thermal decomposition of $\text{CH}_3\text{F}$

Akira Matsugi,

*National Institute of Advanced Industrial Science and Technology (AIST), 16-1 Onogawa, Tsukuba, Ibaraki 305-8569, Japan*

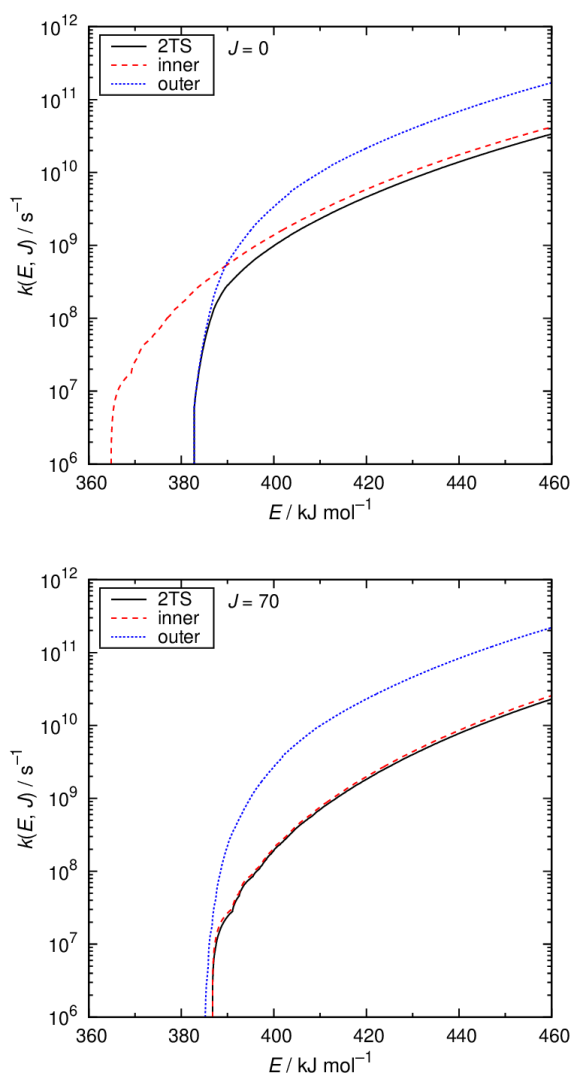

**Figure S1.** The microcanonical rate constants for the HF elimination channel at  $J = 0$  (top) and 70 (bottom) calculated by the two-transition state model (2TS; solid lines) and those for the inner (dashed lines) and outer (dotted lines) transition states.

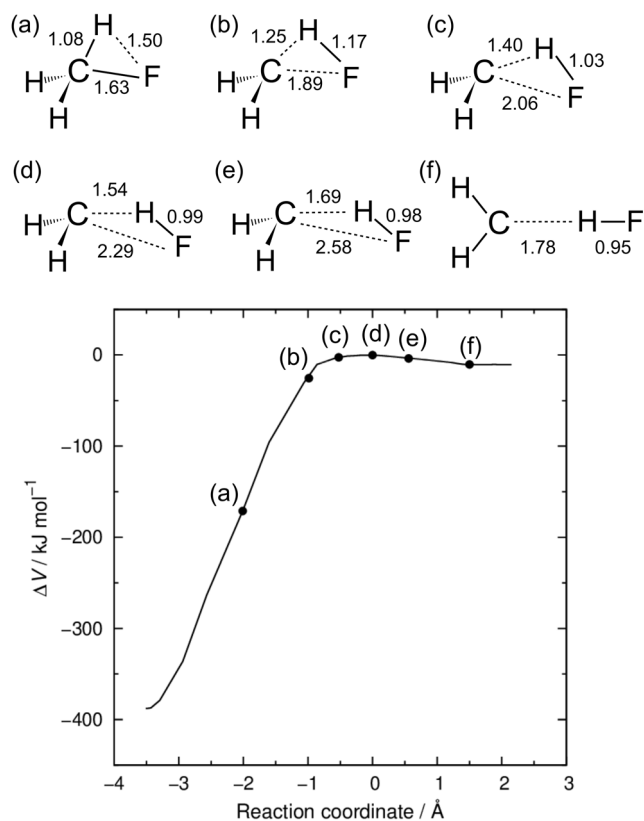

**Figure S2.** Structural evolution and potential energies (calculated at the  $\omega$ B97X-D/6-311++G(d,p) level of theory) along the reaction coordinate for the inner transition state of the HF elimination channel. The potential energies plotted are relative to that at the saddle point. Bond lengths are given in angstroms.
